# Supplementary material for: MicroRNA-125b modulates inflammatory chemokine CCL4 expression in immune cells and its reduction causes CCL4 increase with age
Source: PubMed Central journal article supplement (PMC4364832; doi:10.1111/acel.12294), 2015-01-23

Fig. S1

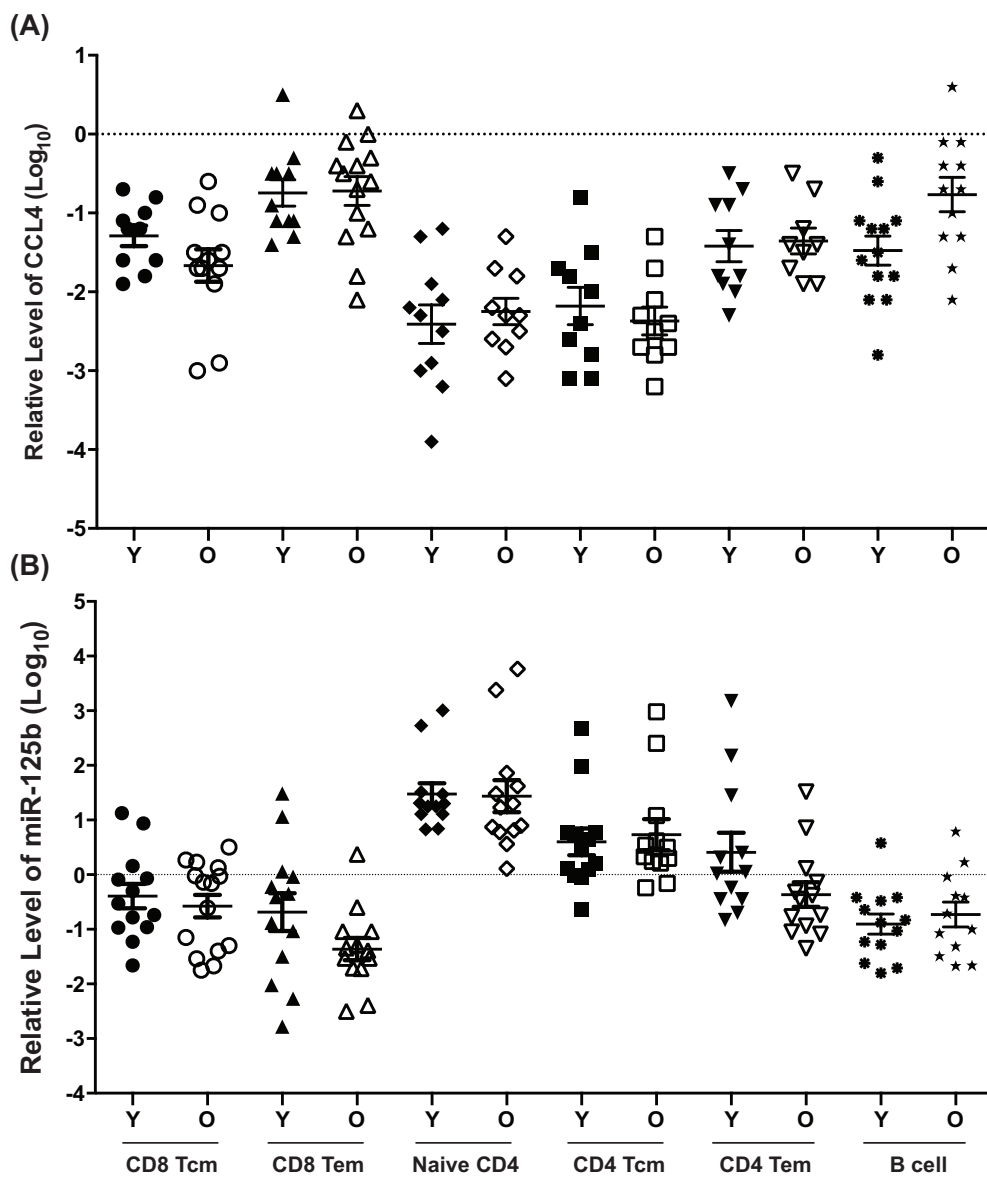

Fig. S2

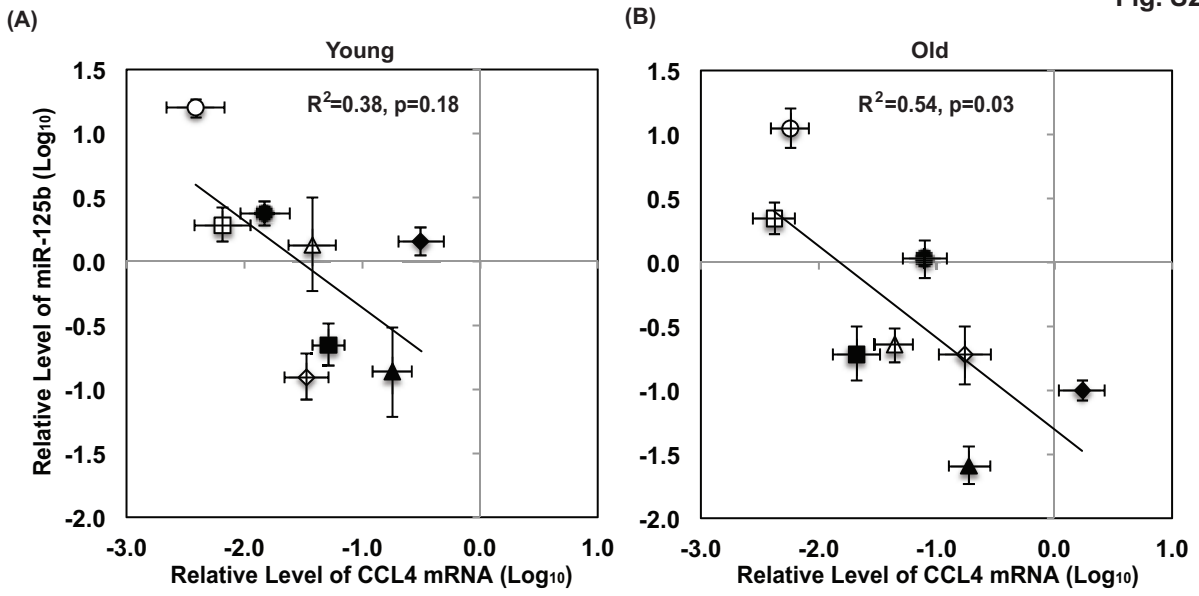

Supplement: acel0014-0200-sd1.pdf [file acel0014-0200-sd1.pdf]
