# Supplementary material for: MicroRNA-125b modulates inflammatory chemokine CCL4 expression in immune cells and its reduction causes CCL4 increase with age
Source: PubMed Central journal article supplement (PMC4364832; doi:10.1111/acel.12294), 2015-01-23
Supplement: acel0014-0200-sd2.pdf [file acel0014-0200-sd2.pdf]

|       |    |   |     |     |     |     |     |     |     |     |     |    |     |
|-------|----|---|-----|-----|-----|-----|-----|-----|-----|-----|-----|----|-----|
| 99    | 82 | M | No  | Yes | Yes | No  | Yes | Yes | No  | No  | Yes | No | No  |
| 100   | 82 | M | No  | No  | No  | No  | No  | No  | No  | No  | Yes | No | Yes |
| 101   | 84 | M | No  | No  | No  | No  | No  | No  | No  | No  | No  | No | Yes |
| 102   | 85 | M | No  | No  | No  | No  | No  | No  | No  | No  | No  | No | Yes |
| 103   | 85 | M | Yes | Yes | Yes | Yes | Yes | Yes | Yes | Yes | Yes | No | No  |
| 104   | 86 | F | No  | No  | No  | No  | No  | No  | No  | Yes | No  | No | No  |
| 105   | 89 | F | Yes | No  | No  | No  | No  | No  | No  | No  | No  | No | No  |
| 106   | 89 | M | Yes | No  | No  | No  | No  | No  | No  | No  | No  | No | No  |
| Total |    |   | 37  | 43  | 27  | 28  | 25  | 21  | 21  | 25  | 44  | 30 | 23  |

Subjects listed under 8 types of immune cells (columns 4-11) were used for the quantitative RT-PCR of CCL4, miR-125b, and pri-miR-125b 1&2 (Fig. 1 and S1)

Subjects under the time course were used for stimulation of monocytes and naïve CD8 T cells in vitro with LPS and anti-CD3/38 respectively (Fig. 2 c & d, Fig. 4).

Subjects under "Transfection" were used for miR-125b inhibition (Fig. 3) and overexpression (Fig. 5).

Subjects under "monocyte surface staining" were used for analysis of monocyte activation markers by flow cytometry (Fig. 2 a & b).

CM=central memory and EM=effector memory.
